# Supplementary material for: Prevalence and Predictors of Overweight and Insulin Resistance in Offspring of Mothers With Gestational Diabetes Mellitus
Source: Oxford University Press journal article supplement (doi:10.2337/dc10-0139), 2010-04-30

ONLINE APPENDIX

Online-Appendix Figure 1 - HOMA-IR (Mean  $\pm$  1 SE) in OGDM with BMI percentile  $\geq 90$  compared to  $< 90$  at the time of HOMA-IR measurement (A) and in offspring of mothers with gestational diabetes and a maternal BMI in early pregnancy  $< 30 \text{ kg/m}^2$  compared to  $\geq 30 \text{ kg/m}^2$  (B).

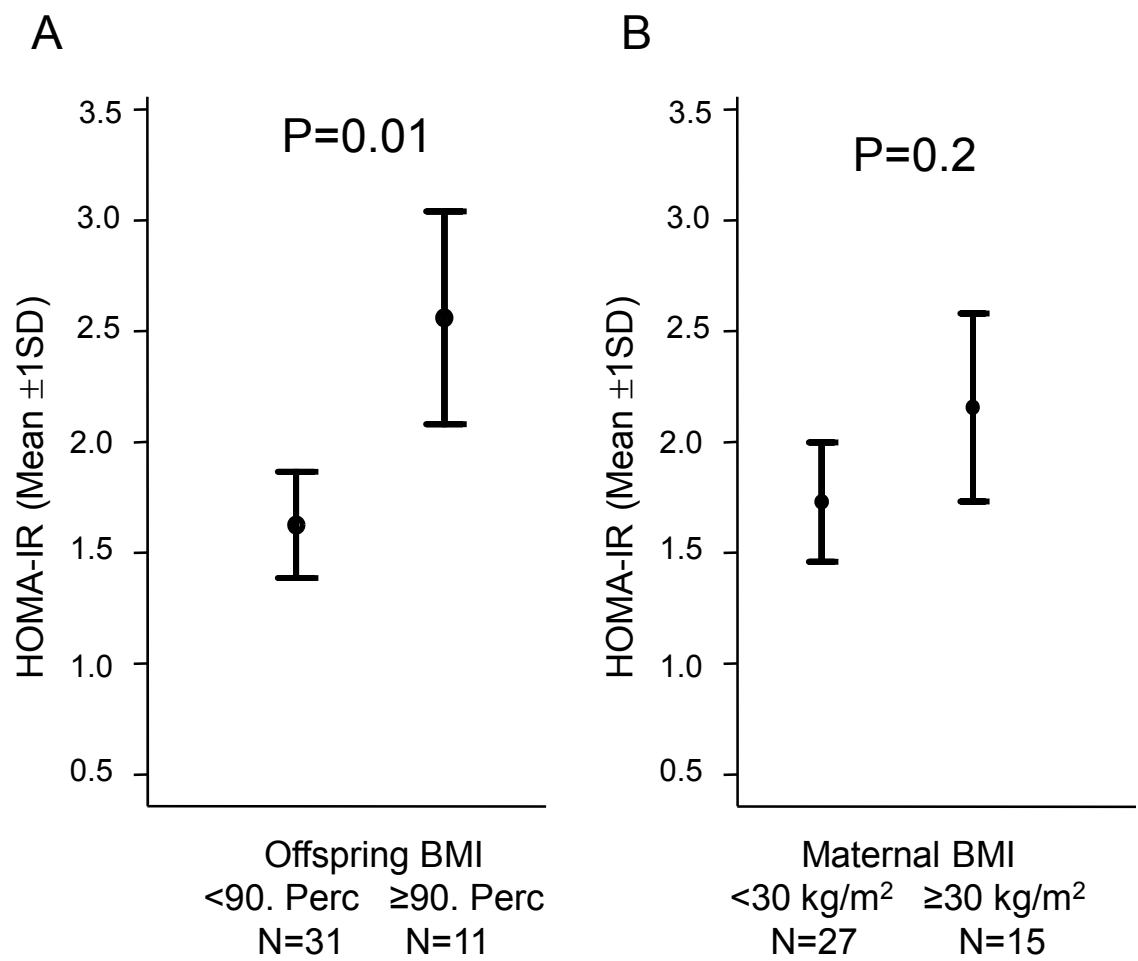

Supplement: dc10-0139_online_appendix.pdf [file dc10-0139_online_appendix.pdf]
